# Supplementary material for: Inequalities in Temporal Effects on Cervical Cancer Mortality in States in Different Geographic Regions of Brazil: An Ecological Study
Source: Preprints.org preprint supplement (doi:10.20944/preprints202202.0192.v1), 2022-02-16
Supplement: Supplementary file 1 [file supplementary]

Table S2. Uncorrected mortality rates from cervical cancer, endometrial cancer, and uterine cancer of unspecified portion per 100,000 women in the states in the North, South, and Southeast regions in Brazil

| Locality | South | | | | | | | |
| --- | --- | --- | --- | --- | --- | --- | --- | --- |
| Period | | | | | | | |
| 1980-84 | 1985-89 | 1990-94 | 1995-94 | 2000-04 | 2005-09 | 2010-14 | 2015-19 |
| Paraná | | | | | | | | |
| CC | 8.83 | 9.35 | 10.38 | 11.53 | 10.30 | 8.31 | 7.35 | 7.96 |
| EC | 0.80 | 1.18 | 1.60 | 1.52 | 1.97 | 2.20 | 1.92 | 2.16 |
| UCOUP | 7.90 | 7.63 | 7.59 | 6.47 | 4.81 | 3.71 | 3.15 | 2.56 |
| Rio Grande do Sul | | | | | | | | |
| CC | 8.51 | 9.63 | 10.31 | 10.63 | 9.56 | 7.77 | 6.67 | 7.73 |
| EC | 1.34 | 1.61 | 1.80 | 2.19 | 2.15 | 1.95 | 1.95 | 1.94 |
| UCOUP | 10.18 | 9.08 | 12.11 | 6.83 | 4.66 | 4.02 | 3.72 | 2.58 |
| Santa Catarina | | | | | | | | |
| CC | 5.98 | 6.85 | 8.22 | 9.20 | 7.63 | 7.04 | 6.85 | 7.45 |
| EC | 0.43 | 0.57 | 1.32 | 1.73 | 1.37 | 1.69 | 1.91 | 1.81 |
| UCOUP | 6.61 | 6.28 | 6.80 | 5.87 | 4.73 | 3.76 | 3.06 | 2.45 |
| Locality | Southeast | | | | | | | |
| Period | | | | | | | |
| 1980-84 | 1985-89 | 1990-94 | 1995-94 | 2000-04 | 2005-09 | 2010-14 | 2015-19 |
| Espírito Santo | | | | | | | | |
| CC | 7.96 | 9.08 | 9.41 | 9.52 | 8.57 | 9.07 | 7.93 | 8.65 |
| EC | 1.33 | 0.82 | 0.69 | 0.91 | 0.81 | 1.21 | 1.32 | 1.96 |
| UCOUP | 6.08 | 7.24 | 7.33 | 4.64 | 4.32 | 5.29 | 4.53 | 2.78 |
| Minas Gerais | | | | | | | | |
| CC | 6.82 | 6.90 | 6.69 | 6.46 | 6.16 | 5.92 | 9.38 | 5.23 |
| EC | 0.58 | 0.68 | 0.82 | 0.80 | 0.99 | 1.05 | 2.70 | 1.81 |
| UCOUP | 8.16 | 7.03 | 6.97 | 5.51 | 3.85 | 3.11 | 5.13 | 2.37 |
| Rio de Janeiro | | | | | | | | |
| CC | 8.68 | 7.94 | 8.82 | 9.11 | 9.72 | 8.46 | 8.05 | 7.82 |
| EC | 2.17 | 2.02 | 2.00 | 2.04 | 2.19 | 2.38 | 2.57 | 2.98 |
| UCOUP | 8.59 | 8.19 | 10.82 | 6.78 | 4.47 | 3.54 | 3.49 | 3.31 |
| São Paulo | | | | | | | | |
| CC | 9.06 | 8.10 | 8.53 | 8.20 | 7.55 | 5.84 | 5.06 | 4.89 |
| EC | 1.81 | 1.72 | 2.27 | 2.38 | 2.31 | 2.31 | 2.24 | 2.59 |
| UCOUP | 7.80 | 6.01 | 7.01 | 6.21 | 4.51 | 3.46 | 2.74 | 2.54 |
| Locality | North | | | | | | | |
| Period | | | | | | | |
| 1980-84 | 1985-89 | 1990-94 | 1995-94 | 2000-04 | 2005-09 | 2010-14 | 2015-19 |
| Acre | | | | | | | | |
| CC | 11.03 | 10.06 | 15.56 | 12.43 | 9.52 | 8.36 | 16.71 | 18.71 |
| EC | 1.23 | 0.00 | 0.00 | 0.99 | 0.64 | 0.87 | 1.60 | 1.91 |
| UCOUP | 9.86 | 6.48 | 7.28 | 6.04 | 4.66 | 3.94 | 2.41 | 1.62 |
| Amazonas | | | | | | | | |
| CC | 13.60 | 17.95 | 13.05 | 19.60 | 19.17 | 25.61 | 31.43 | 28.88 |
| EC | 0.34 | 0.83 | 0.59 | 0.88 | 0.90 | 1.21 | 1.55 | 2.34 |
| UCOUP | 11.31 | 9.48 | 9.69 | 8.26 | 4.84 | 3.96 | 2.34 | 1.77 |
| Amapá | | | | | | | | |
| CC | 20.72 | 40.25 | 28.80 | 22.37 | 17.17 | 15.35 | 23.31 | 20.43 |
| EC | 0.00 | 2.06 | 1.38 | 0.76 | 0.90 | 0.59 | 1.24 | 2.16 |
| UCOUP | 19.39 | 3.31 | 9.48 | 10.19 | 6.95 | 8.81 | 2.38 | 3.71 |
| Pará | | | | | | | | |
| CC | 14.45 | 14.07 | 12.81 | 11.43 | 13.68 | 14.22 | 13.99 | 16.27 |
| EC | 0.50 | 0.42 | 0.45 | 0.45 | 0.65 | 0.73 | 1.00 | 1.49 |
| UCOUP | 5.80 | 6.90 | 6.69 | 6.42 | 2.79 | 3.75 | 4.20 | 3.11 |
| Rondônia | | | | | | | | |
| CC | 10.46 | 11.84 | 8.43 | 9.66 | 9.42 | 10.86 | 9.54 | 12.01 |
| EC | 0.34 | 0.30 | 0.73 | 0.00 | 0.22 | 1.23 | 0.96 | 1.73 |
| UCOUP | 10.10 | 14.51 | 10.91 | 7.61 | 8.22 | 3.74 | 2.72 | 2.19 |
| Rorraima | | | | | | | | |
| CC | 17.64 | 8.51 | 17.64 | 10.14 | 11.85 | 24.60 | 11.96 | 19.92 |
| EC | 3.47 | 0.00 | 0.00 | 0.77 | 2.15 | 1.92 | 1.13 | 1.96 |
| UCOUP | 12.80 | 3.38 | 8.70 | 15.73 | 10.93 | 5.92 | 7.38 | 5.70 |
| Tocantins | | | | | | | | |
| CC | __ | __ | __ | 7.64 | 11.95 | 14.99 | 14.81 | 15.00 |
| EC | __ | __ | __ | 0.49 | 1.00 | 1.09 | 1.19 | 1.18 |
| UCOUP | __ | __ | __ | 5.05 | 3.76 | 3.68 | 3.21 | 2.01 |

CC=cervical cancer, EC=endometrial cancer,UCOUP=uterine cancer of unspecified portion
