# Supplementary material for: Inequalities in Temporal Effects on Cervical Cancer Mortality in States in Different Geographic Regions of Brazil: An Ecological Study
Source: Preprints.org preprint supplement (doi:10.20944/preprints202202.0192.v1), 2022-02-16
Supplement: Supplementary file 2 [file Table S1.docx]

Uncorrected cervical cancer mortality rates per 100,000 women in the states in the North, South, and Southeast regions in Brazil

|  | | | | | | | | | |
| --- | --- | --- | --- | --- | --- | --- | --- | --- | --- |
| Federation Units | 1980-1984 | 1985-1989 | 1990-1994 | 1995-1999 | 2000-2004 | 2005-2009 | 2010-2014 | 2015-2019 | SMR |
| South and Southeast | 1980-1984 | 1985-1989 | 1990-1994 | 1995-1999 | 2000-2004 | 2005-2009 | 2010-2014 | 2015-2019 | SMR |
|  |
| Paraná | 8.83 | 9.35 | 10.38 | 11.53 | 10.30 | 8.31 | 7.35 | 7.96 | 8.90 |  |
| Rio Grande do Sul | 8.51 | 9.63 | 10.31 | 10.63 | 9.56 | 7.77 | 6.67 | 7.73 | 8.57 |  |
| Santa Catarina | 5.98 | 6.85 | 8.22 | 9.20 | 7.63 | 7.04 | 6.85 | 7.45 | 7.37 |  |
| Espírito Santo | 7.96 | 9.08 | 9.41 | 9.52 | 8.57 | 9.07 | 7.93 | 8.65 | 9.16 |  |
| Minas Gerais | 6.82 | 6.90 | 6.69 | 6.46 | 6.16 | 5.92 | 9.38 | 5.23 | 5.93 |  |
| Rio de Janeiro | 8.68 | 7.94 | 8.82 | 9.11 | 9.72 | 8.46 | 8.05 | 7.82 | 8.42 |  |
| São Paulo | 9.06 | 8.10 | 8.53 | 8.20 | 7.55 | 5.84 | 5.06 | 4.89 | 6.57 |  |
| North | 1980-1984 | 1985-1989 | 1990-1994 | 1995-1999 | 2000-2004 | 2005-2009 | 2010-2014 | 2015-2019 | SMR |  |
|  |
| Acre | 11.03 | 10.06 | 15.56 | 12.43 | 9.52 | 8.36 | 16.71 | 18.71 | 13.82 |  |
| Amazonas | 13.60 | 17.95 | 13.05 | 19.60 | 19.17 | 25.61 | 31.43 | 28.88 | 24.13 |  |
| Amapá | 20.72 | 40.25 | 28.80 | 22.37 | 17.17 | 15.35 | 23.31 | 20.43 | 21.55 |  |
| Pará | 14.45 | 14.07 | 12.81 | 11.43 | 13.68 | 14.22 | 13.99 | 16.27 | 14.16 |  |
| Rondônia | 10.46 | 11.84 | 8.43 | 9.66 | 9.42 | 10.86 | 9.54 | 12.01 | 10.44 |  |
| Roraima | 17.64 | 8.51 | 17.64 | 10.14 | 11.85 | 24.60 | 11.96 | 19.92 | 16.38 |  |
| Tocantis | _ | _ | _ | 7.64 | 11.95 | 14.99 | 14.81 | 15.00 | 13.53 |  |

SMR-standardized mean mortality rate
