# Supplementary material for: Inequalities in Temporal Effects on Cervical Cancer Mortality in States in Different Geographic Regions of Brazil: An Ecological Study
Source: Preprints.org preprint supplement (doi:10.20944/preprints202202.0192.v1), 2022-02-16
Supplement: Supplementary file 4 [file Table S3.docx]

**Table S3.** Corrected mortality rates from cervical cancer, per 100,000 women in the states in the North, South, and Southeast regions in Brazil.

| South and Southeast | 1980-1984 | 1985-1989 | 1990-1994 | 1995-1999 | 2000-2004 | 2005-2009 | 2010-2014 | 2015-2019 | SMR |
| --- | --- | --- | --- | --- | --- | --- | --- | --- | --- |
|  |
| Paraná | 12.81 | 13.41 | 14.28 | 14.93 | 12.94 | 10.87 | 10.35 | 11.03 | 14.38 |  |
| Rio Grande do Sul | 18.45 | 18.40 | 18.36 | 17.64 | 14.04 | 11.51 | 9.94 | 10.19 | 13.73 |  |
| Santa Catarina | 13.32 | 13.83 | 15.71 | 15.77 | 13.34 | 11.66 | 10.45 | 10.56 | 12.33 |  |
| Espírito Santo | 15.55 | 18.42 | 18.40 | 19.86 | 16.43 | 14.15 | 12.10 | 11.23 | 14.67 |  |
| Minas Gerais | 16.15 | 14.90 | 15.17 | 13.46 | 11.46 | 10.31 | 8.63 | 8.20 | 11.22 |  |
| Rio de Janeiro | 16.48 | 15.24 | 16.91 | 16.20 | 15.24 | 12.59 | 11.83 | 11.19 | 13.91 |  |
| São Paulo | 16.64 | 14.06 | 15.23 | 13.96 | 11.72 | 8.91 | 7.42 | 6.88 | 10.53 |  |
| North | 1980-1984 | 1985-1989 | 1990-1994 | 1995-1999 | 2000-2004 | 2005-2009 | 2010-2014 | 2015-2019 | SMR |  |
|  |
| Acre | 21.48 | 20.32 | 27.71 | 21.77 | 19.86 | 17.40 | 25.23 | 24.75 | 22.57 |  |
| Amazonas | 28.71 | 33.92 | 25.79 | 30.89 | 31.45 | 37.67 | 40.14 | 36.66 | 35.03 |  |
| Amapá | 40.88 | 49.16 | 46.07 | 38.44 | 29.94 | 30.29 | 33.02 | 29.96 | 35.02 |  |
| Pará | 28.25 | 28.60 | 25.56 | 22.99 | 26.02 | 26.20 | 24.89 | 26.65 | 26.05 |  |
| Rondônia | 23.80 | 30.70 | 20.66 | 19.44 | 20.28 | 16.37 | 14.18 | 15.76 | 17.91 |  |
| Roraima | 33.44 | 15.94 | 31.87 | 24.81 | 28.46 | 39.48 | 25.19 | 32.35 | 30.02 |  |
| Tocantis | _ | _ | _ | 19.45 | 21.31 | 24.18 | 22.71 | 21.12 | 21.36 |  |

SMR-standardized mean mortality rate
